# Supplementary material
Source: PubMed Central journal article supplement (PMC6819659)

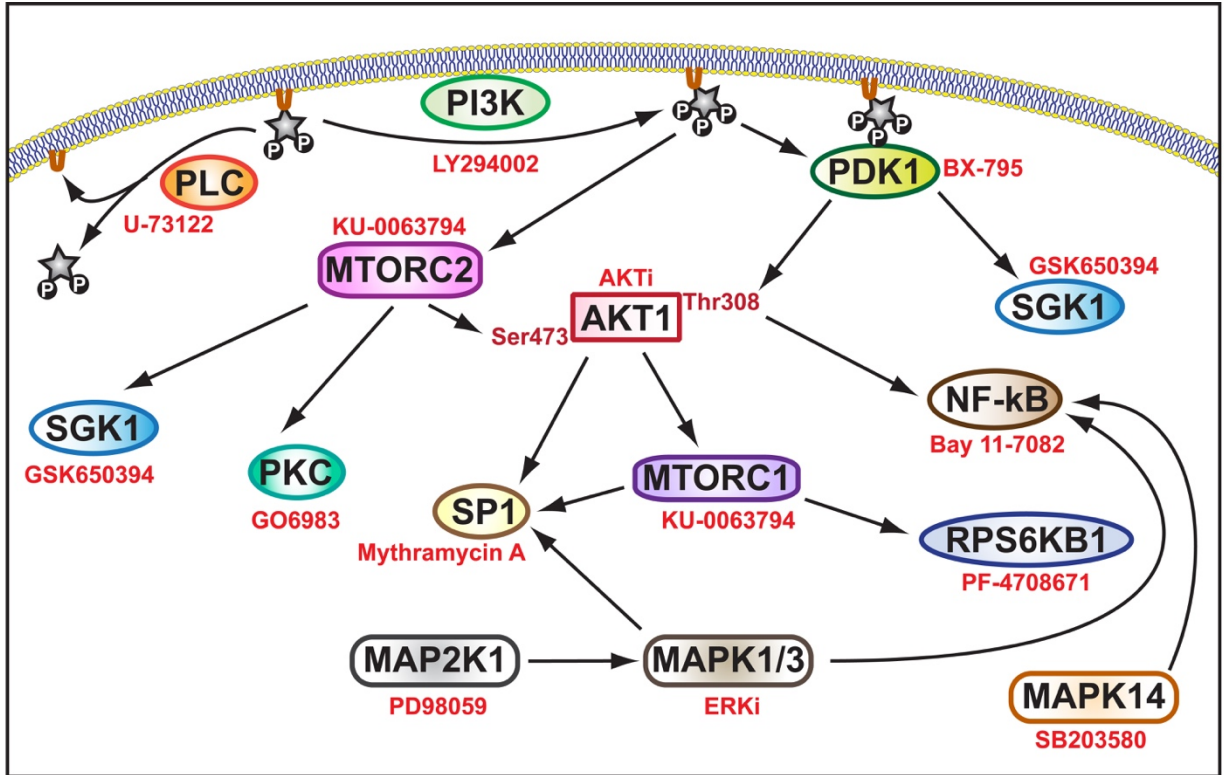

Supplement: mBio.02174-19-sf003.pdf [file mBio.02174-19-sf003.pdf]

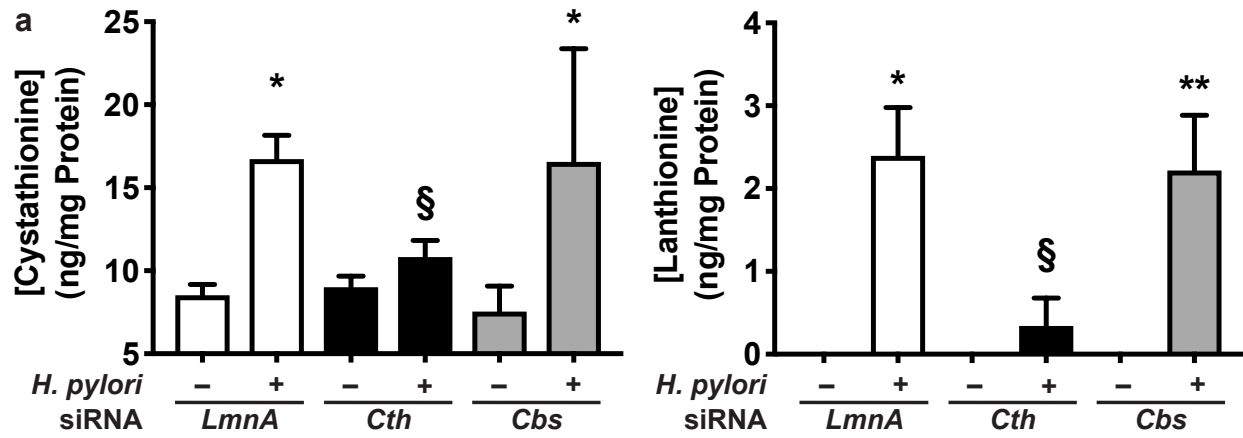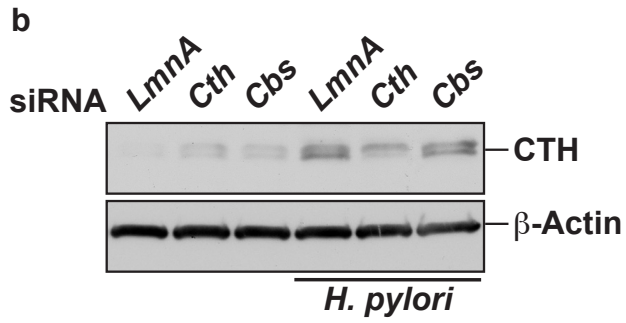

Supplement: mBio.02174-19-sf005.pdf [file mBio.02174-19-sf005.pdf]

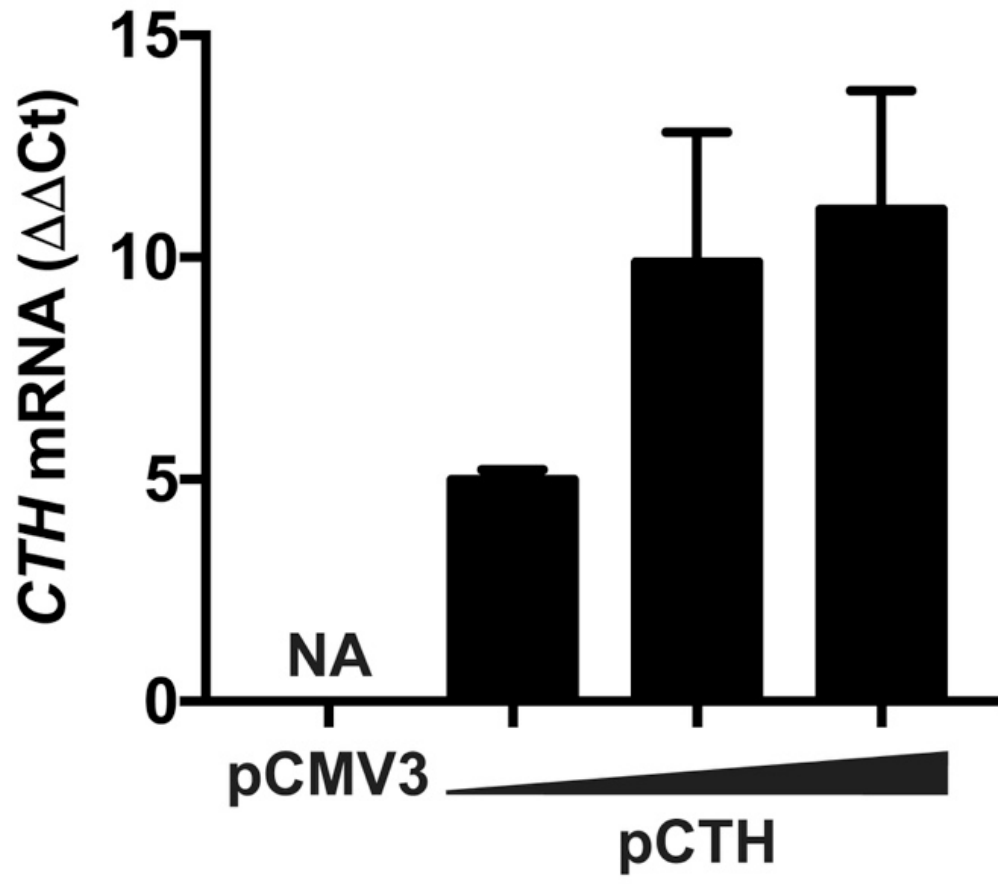

Supplement: mBio.02174-19-sf007.pdf [file mBio.02174-19-sf007.pdf]
